# Supplementary material for: A combined structural and computational investigation of aminobenzylnaphthol compounds derived from the Betti reaction using valine methyl ester
Source: Royal Society of Chemistry journal article supplement (doi:10.1039/d1nj03538j), 2021-01-01
Supplement: d1nj03538j1.pdf [file d1nj03538j1.pdf]

## *Electronic Supplementary Information for*

# **A combined structural and computational investigation of the aminobenzyl naphthols deriving from the Betti reaction with valine methyl ester.**

Maria Annunziata M. Capozzi, \*† Angel Alvarez-Larena,‡ Joan F. Piniella Febrer,‡ and Cosimo Cardellicchio.\*§

(†) Dipartimento di Chimica, Università di Bari, via Orabona 4, 70125 Bari, Italy.

(‡) Departament de Geologia, Servei de Diffracció de Raig X, Universitat Autònoma de Barcelona, Barcelona, Spain.

(§) CNR ICCOM, Dipartimento di Chimica, Università di Bari, via Orabona 4, 70125 Bari, Italy.

### **Index of Electronic Supplementary Information**

Table S1-S5. Crystal data and structure refinements

p. 2-6

Figure S1-S10. ORTEP plots and packing plots of compounds **5-7**

p. 7-11

Figure S11-S13. Comparison between XRPD of compounds **5-7**.

p. 12-13

Figure S14-S19. *Crystal Explorer 17* estimates of lattice energies of compounds **5-7**

p. 14-19

Figure S20. Molecular Overlay of Structures

p. 20

**Table S1. Crystal data and structure refinement for (S, S)-(5)**

|                                   |                                                 |                 |
|-----------------------------------|-------------------------------------------------|-----------------|
| Empirical formula                 | C <sub>23</sub> H <sub>25</sub> NO <sub>3</sub> |                 |
| Formula weight                    | 363.44                                          |                 |
| Solvent of crystallization        | Ethanol                                         |                 |
| Temperature                       | 296(2) K                                        |                 |
| Wavelength                        | 0.71073 Å                                       |                 |
| Crystal system                    | Monoclinic                                      |                 |
| Space group                       | P 2 <sub>1</sub>                                |                 |
| Unit cell dimensions              | a = 9.6415(7) Å                                 | α = 90°.        |
|                                   | b = 9.7108(8) Å                                 | β = 97.262(1)°. |
|                                   | c = 11.1357(9) Å                                | γ = 90°.        |
| Volume                            | 1034.24(14) Å <sup>3</sup>                      |                 |
| Z                                 | 2                                               |                 |
| Z'                                | 1                                               |                 |
| Density (calculated)              | 1.167 Mg/m <sup>3</sup>                         |                 |
| Absorption coefficient            | 0.077 mm <sup>-1</sup>                          |                 |
| F(000)                            | 388                                             |                 |
| Crystal size                      | 0.40 x 0.30 x 0.20 mm <sup>3</sup>              |                 |
| Theta range for data collection   | 1.844 to 28.762°.                               |                 |
| Index ranges                      | -12 ≤ h ≤ 12, -12 ≤ k ≤ 13, -14 ≤ l ≤ 14        |                 |
| Reflections collected             | 8352                                            |                 |
| Independent reflections           | 4719 [R(int) = 0.0170]                          |                 |
| Completeness to theta = 25.000°   | 99.9 %                                          |                 |
| Absorption correction             | Semi-empirical from equivalents                 |                 |
| Max. and min. transmission        | 1 and 0.832                                     |                 |
| Refinement method                 | Full-matrix least-squares on F <sup>2</sup>     |                 |
| Data / restraints / parameters    | 4719 / 8 / 254                                  |                 |
| Goodness-of-fit on F <sup>2</sup> | 1.034                                           |                 |
| Final R indices [I > 2σ(I)]       | R1 = 0.0619, wR2 = 0.1572                       |                 |
| R indices (all data)              | R1 = 0.0962, wR2 = 0.1804                       |                 |
| Absolute structure parameter      | -0.4(6)                                         |                 |
| Largest diff. peak and hole       | 0.32 and -0.19 e.Å <sup>-3</sup>                |                 |

**Table S2. Crystal data and structure refinement for (S, S) + (R, R)-(5)**

|                                   |                                                 |                 |
|-----------------------------------|-------------------------------------------------|-----------------|
| Empirical formula                 | C <sub>23</sub> H <sub>25</sub> NO <sub>3</sub> |                 |
| Formula weight                    | 363.44                                          |                 |
| Solvent of crystallization        | Ethanol                                         |                 |
| Temperature                       | 296(2) K                                        |                 |
| Wavelength                        | 0.71073 Å                                       |                 |
| Crystal system                    | Monoclinic                                      |                 |
| Space group                       | P 2 <sub>1</sub> /n                             |                 |
| Unit cell dimensions              | a = 9.1174(7) Å                                 | α = 90°.        |
|                                   | b = 13.0496(11) Å                               | β = 97.831(2)°. |
|                                   | c = 16.4573(13) Å                               | γ = 90°.        |
| Volume                            | 1939.8(3) Å <sup>3</sup>                        |                 |
| Z                                 | 4                                               |                 |
| Z'                                | 1                                               |                 |
| Density (calculated)              | 1.244 Mg/m <sup>3</sup>                         |                 |
| Absorption coefficient            | 0.082 mm <sup>-1</sup>                          |                 |
| F(000)                            | 776                                             |                 |
| Crystal size                      | 0.40 x 0.30 x 0.30 mm <sup>3</sup>              |                 |
| Theta range for data collection   | 1.999 to 28.809°.                               |                 |
| Index ranges                      | -12 ≤ h ≤ 12, -16 ≤ k ≤ 16, -21 ≤ l ≤ 22        |                 |
| Reflections collected             | 15332                                           |                 |
| Independent reflections           | 4686 [R(int) = 0.0564]                          |                 |
| Completeness to theta = 25.000°   | 100.0 %                                         |                 |
| Absorption correction             | Semi-empirical from equivalents                 |                 |
| Max. and min. transmission        | 1 and 0.856                                     |                 |
| Refinement method                 | Full-matrix least-squares on F <sup>2</sup>     |                 |
| Data / restraints / parameters    | 4686 / 0 / 255                                  |                 |
| Goodness-of-fit on F <sup>2</sup> | 1.015                                           |                 |
| Final R indices [I > 2σ(I)]       | R1 = 0.0575, wR2 = 0.1175                       |                 |
| R indices (all data)              | R1 = 0.1205, wR2 = 0.1393                       |                 |
| Largest diff. peak and hole       | 0.16 and -0.16 e.Å <sup>-3</sup>                |                 |

**Table S3. Crystal data and structure refinement for (S, S)-(6)**

|                                   |                                                  |          |
|-----------------------------------|--------------------------------------------------|----------|
| Empirical formula                 | C <sub>23</sub> H <sub>24</sub> FNO <sub>3</sub> |          |
| Formula weight                    | 381.43                                           |          |
| Solvent of crystallization        | Ethanol                                          |          |
| Temperature                       | 296(2) K                                         |          |
| Wavelength                        | 0.71073 Å                                        |          |
| Crystal system                    | Orthorhombic                                     |          |
| Space group                       | P2 <sub>1</sub> 2 <sub>1</sub> 2 <sub>1</sub>    |          |
| Unit cell dimensions              | a = 9.0522(5) Å                                  | α = 90°. |
|                                   | b = 13.5590(7) Å                                 | β = 90°. |
|                                   | c = 16.6684(9) Å                                 | γ = 90°. |
| Volume                            | 2045.86(19) Å <sup>3</sup>                       |          |
| Z                                 | 4                                                |          |
| Z'                                | 1                                                |          |
| Density (calculated)              | 1.238 Mg/m <sup>3</sup>                          |          |
| Absorption coefficient            | 0.088 mm <sup>-1</sup>                           |          |
| F(000)                            | 808                                              |          |
| Crystal size                      | 0.42 x 0.29 x 0.22 mm <sup>3</sup>               |          |
| Theta range for data collection   | 1.936 to 28.748°.                                |          |
| Index ranges                      | -11 ≤ h ≤ 11, -17 ≤ k ≤ 17, -21 ≤ l ≤ 21         |          |
| Reflections collected             | 16466                                            |          |
| Independent reflections           | 4789 [R(int) = 0.0222]                           |          |
| Completeness to theta = 25.000°   | 100.0 %                                          |          |
| Absorption correction             | Semi-empirical from equivalents                  |          |
| Max. and min. transmission        | 1 and 0.919                                      |          |
| Refinement method                 | Full-matrix least-squares on F <sup>2</sup>      |          |
| Data / restraints / parameters    | 4789 / 0 / 262                                   |          |
| Goodness-of-fit on F <sup>2</sup> | 1.030                                            |          |
| Final R indices [I > 2σ(I)]       | R1 = 0.0403, wR2 = 0.0943                        |          |
| R indices (all data)              | R1 = 0.0538, wR2 = 0.1007                        |          |
| Absolute structure parameter      | 0.1(3)                                           |          |
| Largest diff. peak and hole       | 0.13 and -0.15 e.Å <sup>-3</sup>                 |          |

**Table S4. Crystal data and structure refinement for (S, S)-(7)**

|                                   |                                                   |                 |
|-----------------------------------|---------------------------------------------------|-----------------|
| Empirical formula                 | C <sub>23</sub> H <sub>24</sub> ClNO <sub>3</sub> |                 |
| Formula weight                    | 397.88                                            |                 |
| Solvent of crystallization        | Ethanol                                           |                 |
| Temperature                       | 296(2) K                                          |                 |
| Wavelength                        | 0.71073 Å                                         |                 |
| Crystal system                    | Monoclinic                                        |                 |
| Space group                       | P 2 <sub>1</sub>                                  |                 |
| Unit cell dimensions              | a = 9.5094(5) Å                                   | α = 90°.        |
|                                   | b = 18.3294(9) Å                                  | β = 96.750(1)°. |
|                                   | c = 12.3185(6) Å                                  | γ = 90°.        |
| Volume                            | 2132.25(19) Å <sup>3</sup>                        |                 |
| Z                                 | 4                                                 |                 |
| Z'                                | 2                                                 |                 |
| Density (calculated)              | 1.239 Mg/m <sup>3</sup>                           |                 |
| Absorption coefficient            | 0.202 mm <sup>-1</sup>                            |                 |
| F(000)                            | 840                                               |                 |
| Crystal size                      | 0.42 x 0.33 x 0.20 mm <sup>3</sup>                |                 |
| Theta range for data collection   | 1.665 to 28.749°.                                 |                 |
| Index ranges                      | -12 ≤ h ≤ 12, -23 ≤ k ≤ 23, -16 ≤ l ≤ 16          |                 |
| Reflections collected             | 17187                                             |                 |
| Independent reflections           | 9787 [R(int) = 0.0155]                            |                 |
| Completeness to theta = 25.000°   | 99.9 %                                            |                 |
| Absorption correction             | Semi-empirical from equivalents                   |                 |
| Max. and min. transmission        | 1 and 0.903                                       |                 |
| Refinement method                 | Full-matrix least-squares on F <sup>2</sup>       |                 |
| Data / restraints / parameters    | 9787 / 13 / 523                                   |                 |
| Goodness-of-fit on F <sup>2</sup> | 1.013                                             |                 |
| Final R indices [I > 2σ(I)]       | R1 = 0.0447, wR2 = 0.1055                         |                 |
| R indices (all data)              | R1 = 0.0630, wR2 = 0.1155                         |                 |
| Absolute structure parameter      | 0.047(19)                                         |                 |
| Largest diff. peak and hole       | 0.19 and -0.15 e.Å <sup>-3</sup>                  |                 |

**Table S5. Crystal data and structure refinement for (*S,S*) + (*R,R*)-(7)**

|                                   |                                                   |                 |
|-----------------------------------|---------------------------------------------------|-----------------|
| Empirical formula                 | C <sub>23</sub> H <sub>24</sub> ClNO <sub>3</sub> |                 |
| Formula weight                    | 397.88                                            |                 |
| Solvent of crystallization        | Ethanol                                           |                 |
| Temperature                       | 296(2) K                                          |                 |
| Wavelength                        | 0.71073 Å                                         |                 |
| Crystal system                    | Monoclinic                                        |                 |
| Space group                       | P 2 <sub>1</sub> /n                               |                 |
| Unit cell dimensions              | a = 13.0861(7) Å                                  | α = 90°.        |
|                                   | b = 9.8938(5) Å                                   | β = 94.928(1)°. |
|                                   | c = 16.1156(8) Å                                  | γ = 90°.        |
| Volume                            | 2078.79(18) Å <sup>3</sup>                        |                 |
| Z                                 | 4                                                 |                 |
| Z'                                | 1                                                 |                 |
| Density (calculated)              | 1.271 Mg/m <sup>3</sup>                           |                 |
| Absorption coefficient            | 0.207 mm <sup>-1</sup>                            |                 |
| F(000)                            | 840                                               |                 |
| Crystal size                      | 0.66 x 0.44 x 0.22 mm <sup>3</sup>                |                 |
| Theta range for data collection   | 1.926 to 28.747°.                                 |                 |
| Index ranges                      | -17 ≤ h ≤ 17, -13 ≤ k ≤ 13, -21 ≤ l ≤ 21          |                 |
| Reflections collected             | 16222                                             |                 |
| Independent reflections           | 5033 [R(int) = 0.0260]                            |                 |
| Completeness to theta = 25.000°   | 99.9 %                                            |                 |
| Absorption correction             | Semi-empirical from equivalents                   |                 |
| Max. and min. transmission        | 1 and 0.846                                       |                 |
| Refinement method                 | Full-matrix least-squares on F <sup>2</sup>       |                 |
| Data / restraints / parameters    | 5033 / 0 / 262                                    |                 |
| Goodness-of-fit on F <sup>2</sup> | 1.028                                             |                 |
| Final R indices [I > 2σ(I)]       | R1 = 0.0491, wR2 = 0.1303                         |                 |
| R indices (all data)              | R1 = 0.0716, wR2 = 0.1450                         |                 |
| Largest diff. peak and hole       | 0.24 and -0.25 e.Å <sup>-3</sup>                  |                 |

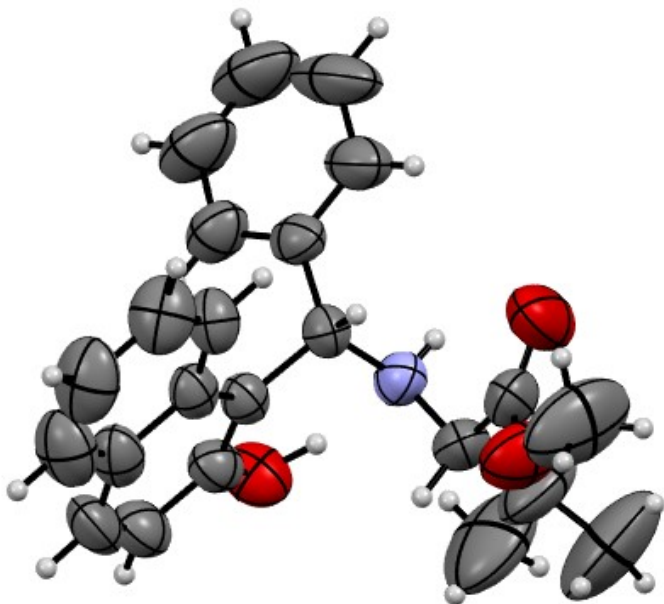

**Figure S1.** ORTEP plot (50% probability level) of (*S,S*)-aminobenzyl-naphthol-5

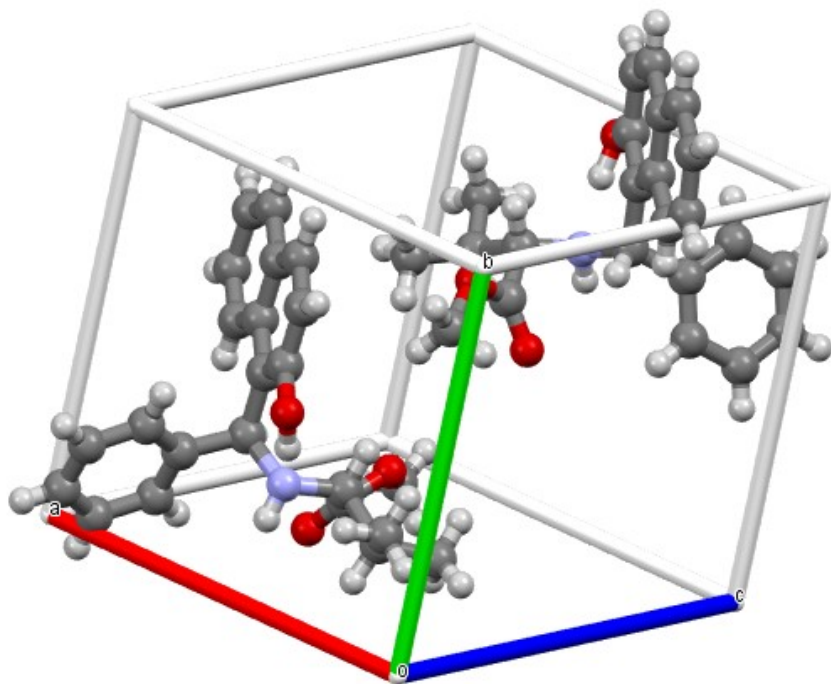

**Figure S2.** Packing plot of (*S,S*)-aminobenzyl-naphthol-5

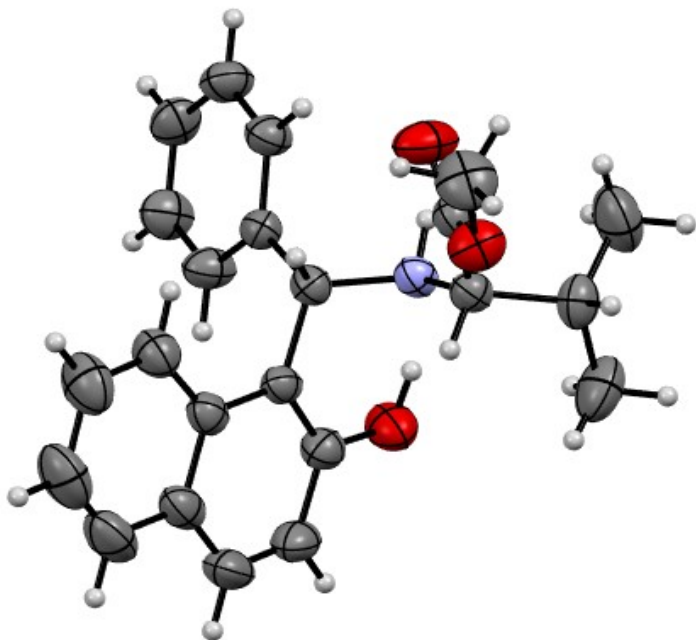

**Figure S3.** ORTEP plot (50% probability level) of (*S,S*) + (*R,R*)-aminobenzyl-naphthol **5**

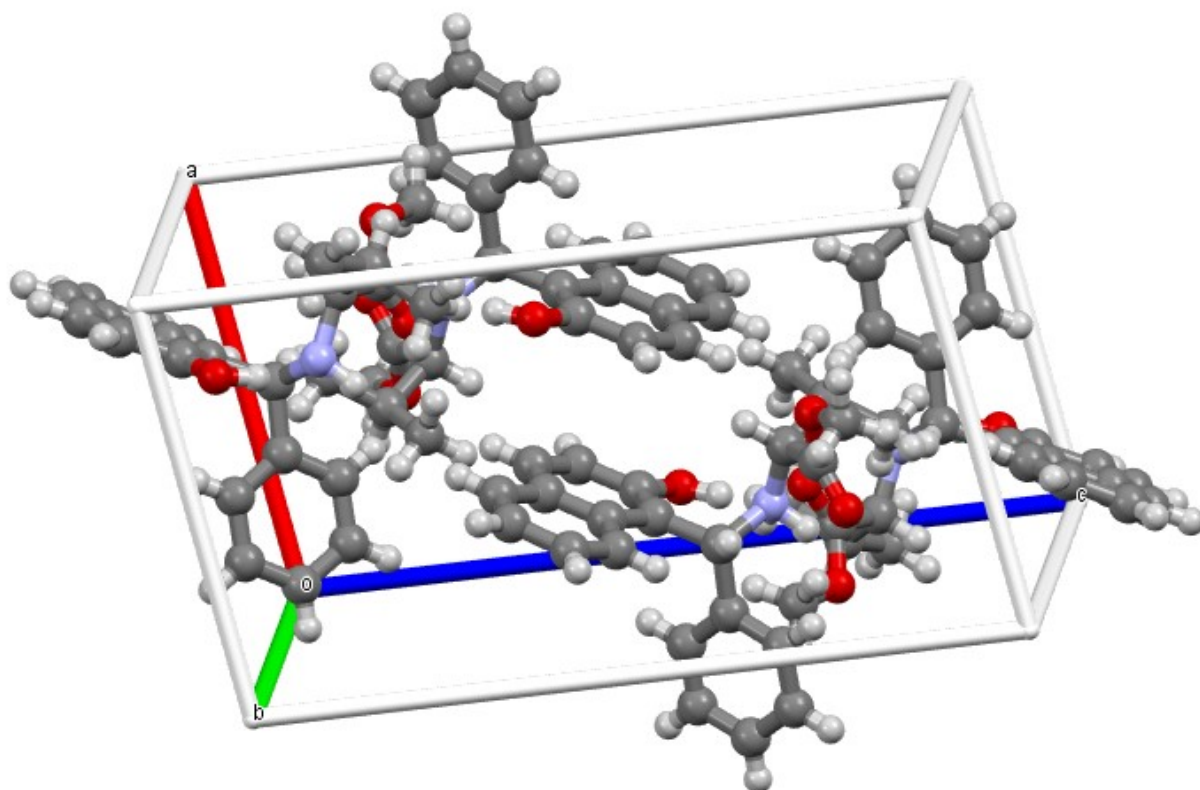

**Figure S4.** Packing plot of (*S,S*) + (*R,R*)-aminobenzyl-naphthol-**5**



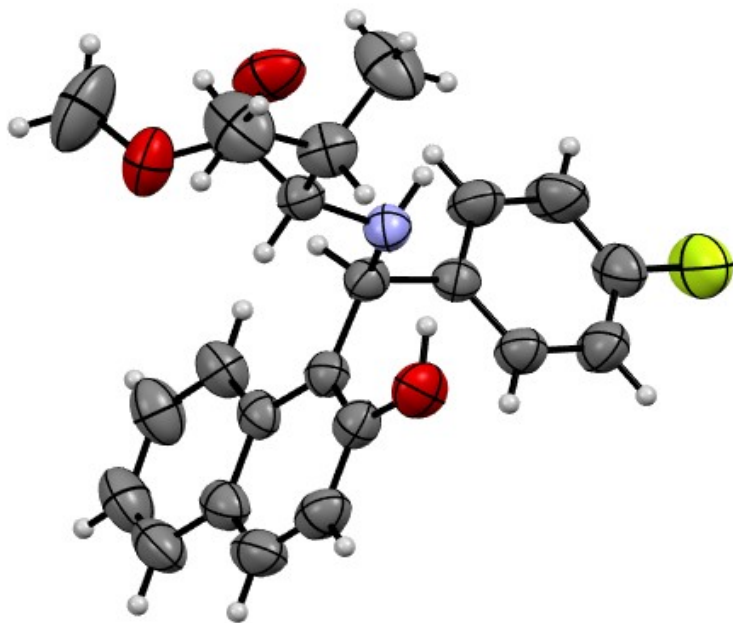

**Figure S5.** ORTEP plot (50% probability level) of (*S,S*)-aminobenzyl-naphthol **6**

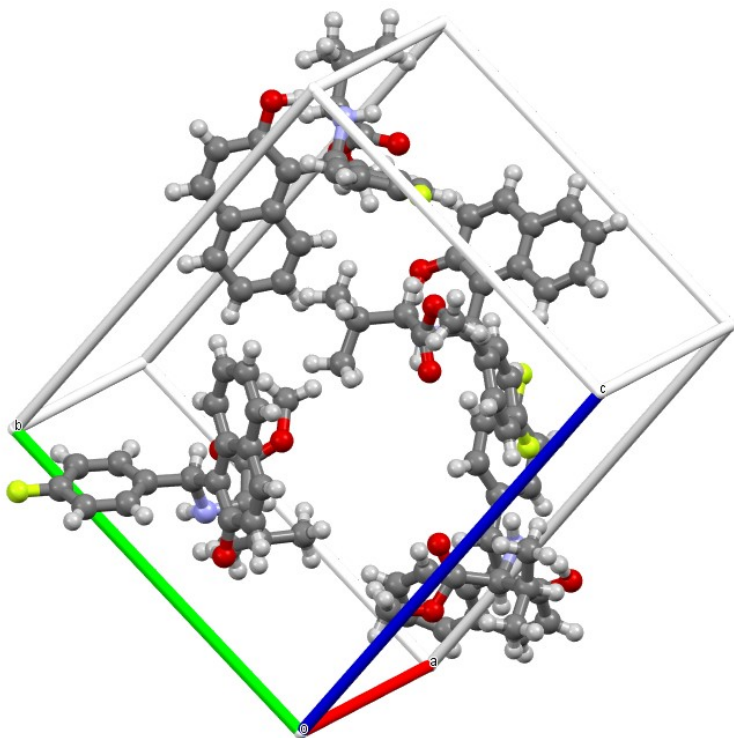

**Figure S6.** Packing plot of (*S,S*)-aminobenzyl-naphthol **6**

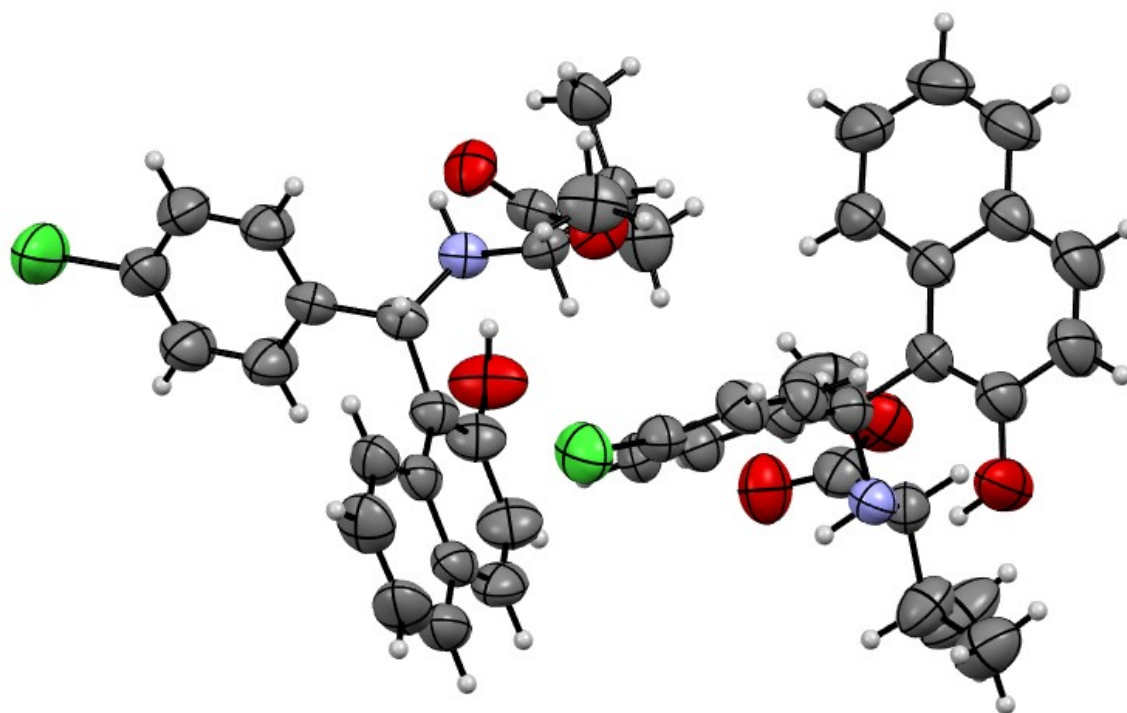

**Figure S7.** ORTEP plot (50% probability level) of (*S,S*) aminobenzyl-naphthol 7

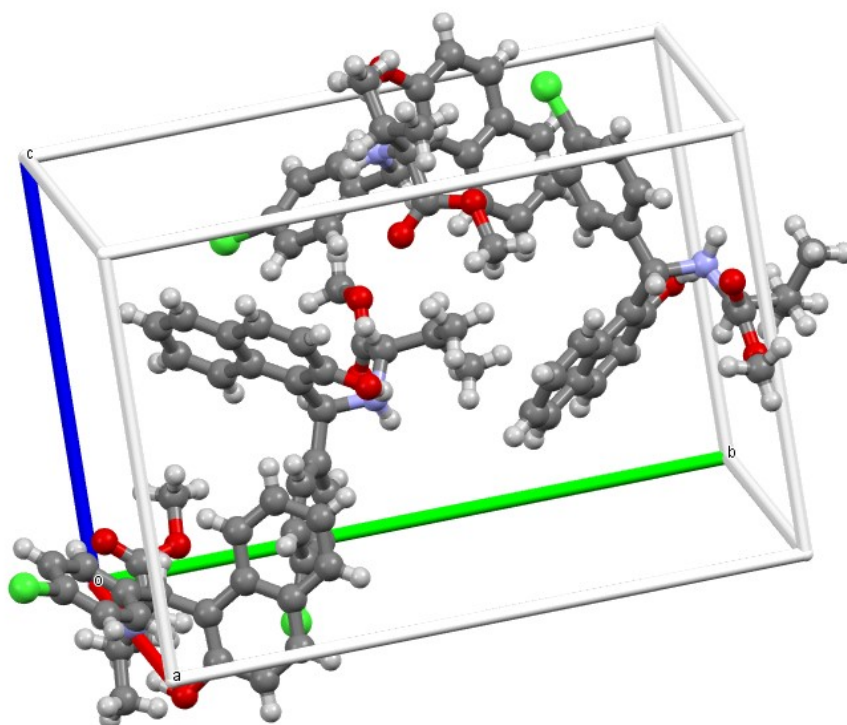

**Figure S8.** Packing plot of (*S,S*) aminobenzyl-naphthol 7

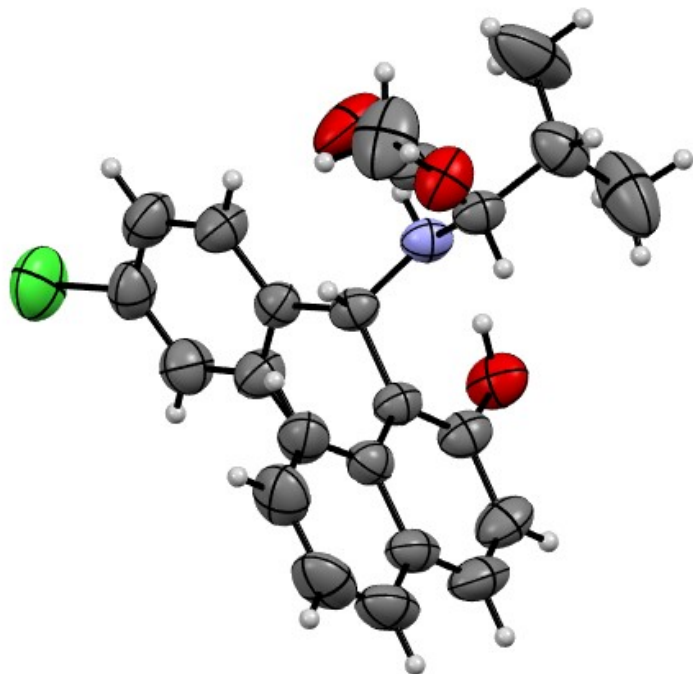

**Figure S9.** ORTEP plot (50% probability level) of (*S,S*) + (*R,R*)-aminobenzyl naphthol 7

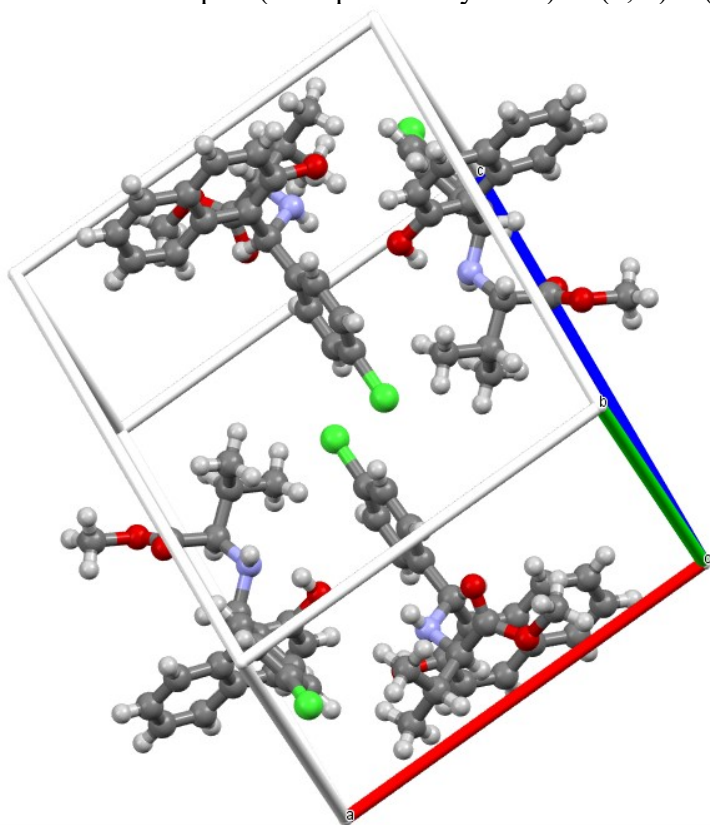

**Figure S10.** Packing plot of (*S,S*) + (*R,R*)-aminobenzyl naphthol 7

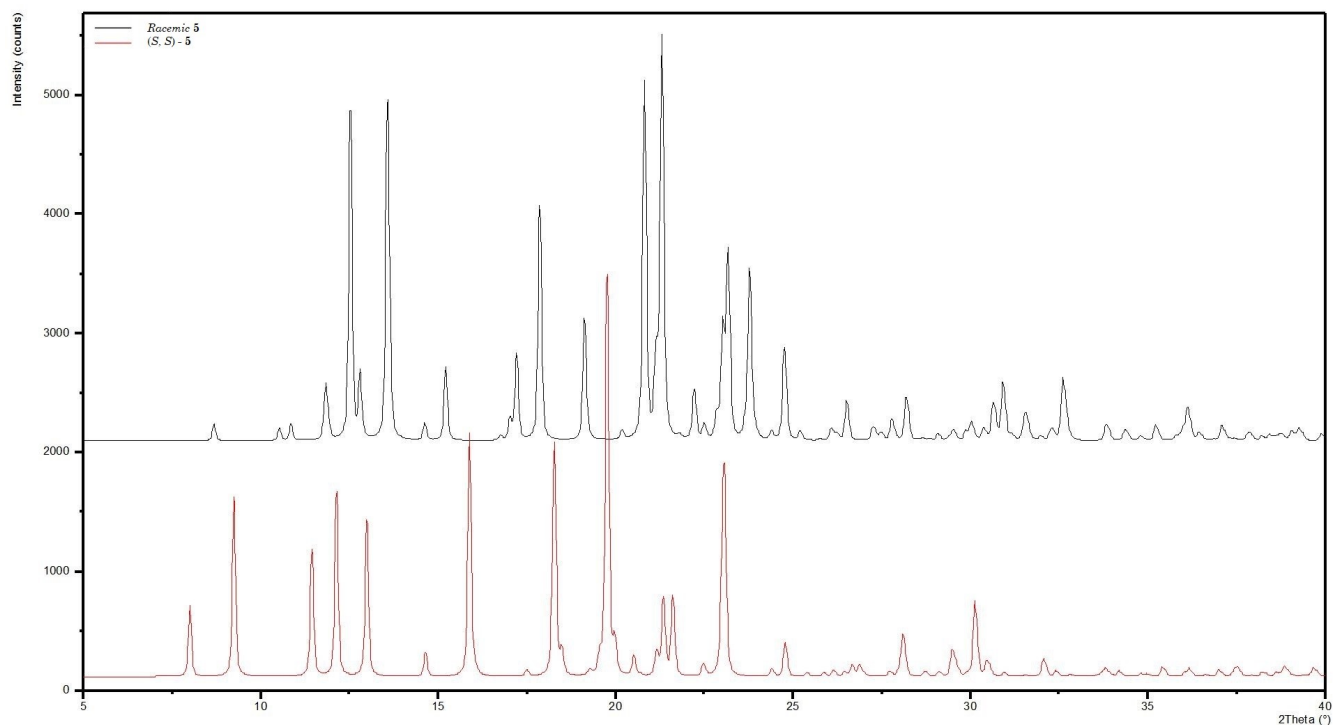

**Figure S11.** Comparison between the X-Ray Powder Diffraction (XRPD) of *racemic-5* and *(S,S)-5*.

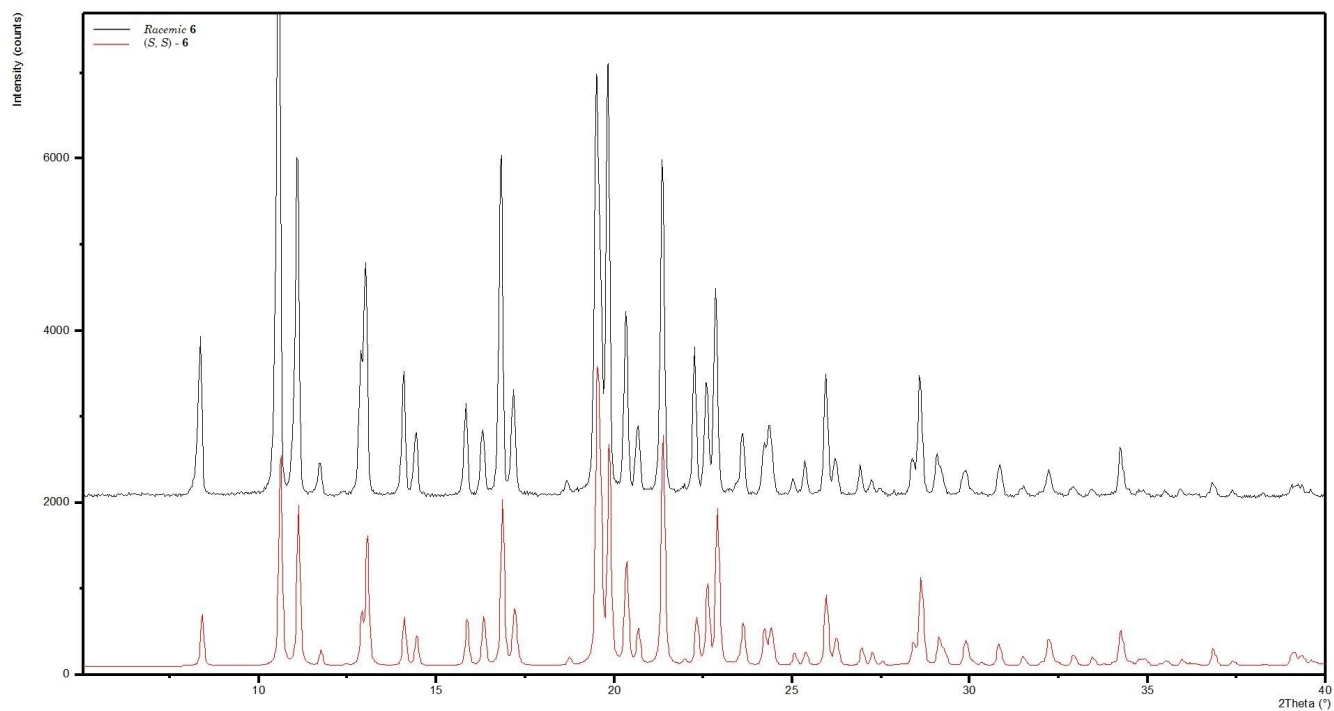

**Figure S12.** Comparison between the X-Ray Powder Diffraction (XRPD) of *racemic-6* and *(S,S)-6*.

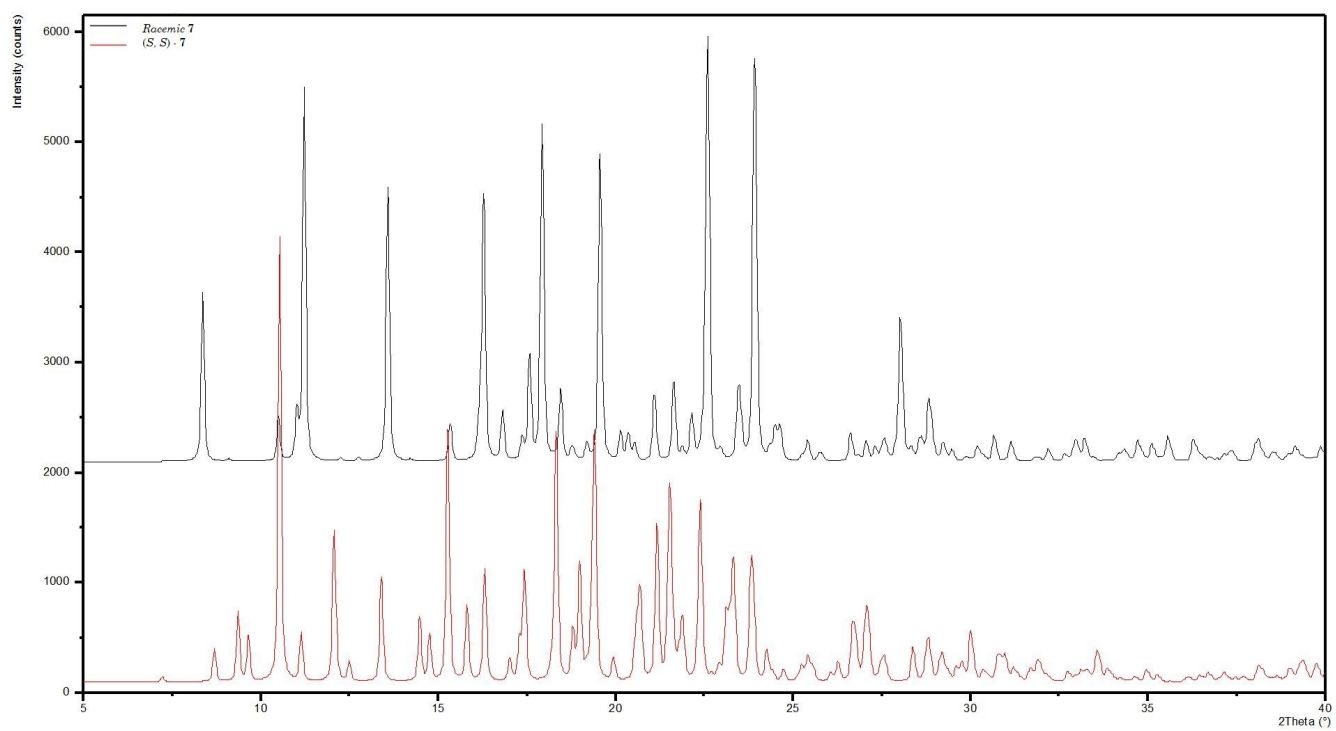

**Figure S13.** Comparison between the X-Ray Powder Diffraction (XRPD) of *racemic-7* and *(S,S)-7*.

| N | Symop         | R     | Electron Density | E_ele | E_pol    | E_dis  | E_rep  | E_tot    |          |         |           |          |          |
|---|---------------|-------|------------------|-------|----------|--------|--------|----------|----------|---------|-----------|----------|----------|
|   |               |       |                  | 1,057 | 0,74     | 0,871  | 0,618  |          |          |         |           |          |          |
| 2 | -x, y+1/2, -z | 7,49  | B3LYP/6-31G(d,p) | -7,8  | -8,2446  | -3     | -2,22  | -44,1    | -38,4111 | 21,2    | 13,1016   | -35,7    | -35,7741 |
| 2 | -x, y+1/2, -z | 8,67  | B3LYP/6-31G(d,p) | -3,9  | -4,1223  | -1,9   | -1,406 | -31,1    | -27,0881 | 13,8    | 8,5284    | -24,1    | -24,1    |
| 2 | -x, y+1/2, -z | 9,95  | B3LYP/6-31G(d,p) | -6,1  | -6,4477  | -0,9   | -0,666 | -25      | -21,775  | 16,2    | 10,0116   | -19      | -19      |
| 2 | -x, y+1/2, -z | 9,54  | B3LYP/6-31G(d,p) | -6    | -6,342   | -0,6   | -0,444 | -21,6    | -18,8136 | 15      | 9,27      | -16,3    | -16,3    |
| 2 | x, y, z       | 9,71  | B3LYP/6-31G(d,p) | -2,5  | -2,6425  | -1     | -0,74  | -15,2    | -13,2392 | 6,4     | 3,9552    | -12,7    | -12,7    |
| 2 | x, y, z       | 9,64  | B3LYP/6-31G(d,p) | -1,2  | -1,2684  | -0,6   | -0,444 | -15,3    | -13,3263 | 5,3     | 3,2754    | -11,8    | -11,8    |
| 2 | x, y, z       | 11,14 | B3LYP/6-31G(d,p) | -1,3  | -1,3741  | -0,4   | -0,296 | -5,2     | -4,5292  | 0,8     | 0,4944    | -5,7     | -5,7     |
| 2 | x, y, z       | 13,68 | B3LYP/6-31G(d,p) | 0     | 0        | 0      | 0      | -2,1     | -1,8291  | 0       | 0         | -1,8     | -1,8     |
| 2 | -x, y+1/2, -z | 14,11 | B3LYP/6-31G(d,p) | -0,4  | -0,4228  | 0      | 0      | -0,6     | -0,5226  | 0       | 0         | -0,9     | -0,9     |
| 2 | x, y, z       | 14,78 | B3LYP/6-31G(d,p) | -0,4  | -0,4228  | 0      | 0      | -0,4     | -0,3484  | 0       | 0         | -0,8     | -0,8     |
| 2 | x, y, z       | 13,68 | B3LYP/6-31G(d,p) | -0,1  | -0,1057  | 0      | 0      | -0,5     | -0,4355  | 0       | 0         | -0,5     | -0,5     |
| 2 | x, y, z       | 15,62 | B3LYP/6-31G(d,p) | -0,1  | -0,1057  | 0      | 0      | -0,4     | -0,3484  | 0       | 0         | -0,4     | -0,4     |
| 2 | -x, y+1/2, -z | 15,66 | B3LYP/6-31G(d,p) | 0     | 0        | 0      | 0      | -0,3     | -0,2613  | 0       | 0         | -0,3     | -0,3     |
| 2 | -x, y+1/2, -z | 15,64 | B3LYP/6-31G(d,p) | -0,1  | -0,1057  | 0      | 0      | -0,2     | -0,1742  | 0       | 0         | -0,3     | -0,3     |
| 2 | -x, y+1/2, -z | 16,24 | B3LYP/6-31G(d,p) | -0,1  | -0,1057  | 0      | 0      | -0,2     | -0,1742  | 0       | 0         | -0,3     | -0,3     |
| 2 | x, y, z       | 13,78 | B3LYP/6-31G(d,p) | 0,1   | 0,1057   | 0      | 0      | -0,4     | -0,3484  | 0       | 0         | -0,3     | -0,3     |
| 2 | x, y, z       | 14,78 | B3LYP/6-31G(d,p) | 0,1   | 0,1057   | 0      | 0      | -0,5     | -0,4355  | 0       | 0         | -0,3     | -0,3     |
| 2 | -x, y+1/2, -z | 16,72 | B3LYP/6-31G(d,p) | -0,2  | -0,2114  | 0      | 0      | -0,2     | -0,1742  | 0       | 0         | -0,3     | -0,3     |
| 2 | -x, y+1/2, -z | 16,96 | B3LYP/6-31G(d,p) | 0     | 0        | 0      | 0      | -0,2     | -0,1742  | 0       | 0         | -0,2     | -0,2     |
| 1 | -x, y+1/2, -z | 17,11 | B3LYP/6-31G(d,p) | -0,1  | -0,05285 | 0      | 0      | -0,1     | -0,04355 | 0       | 0         | -0,2     | -0,1     |
| 2 | x, y, z       | 16,86 | B3LYP/6-31G(d,p) | 0     | 0        | 0      | 0      | -0,2     | -0,1742  | 0       | 0         | -0,1     | -0,1     |
| 2 | x, y, z       | 16,86 | B3LYP/6-31G(d,p) | 0     | 0        | 0      | 0      | -0,1     | -0,0871  | 0       | 0         | -0,1     | -0,1     |
| 1 | -x, y+1/2, -z | 16,89 | B3LYP/6-31G(d,p) | 0,1   | 0,05285  | 0      | 0      | -0,1     | -0,04355 | 0       | 0         | 0        | 0        |
| 2 | -x, y+1/2, -z | 18,19 | B3LYP/6-31G(d,p) | 0     | 0        | 0      | 0      | -0,1     | -0,0871  | 0       | 0         | 0        | 0        |
|   |               |       |                  |       | -31,71   | -6,216 |        | -142,844 |          | 48,6366 | -132,1334 | -132,074 |          |

Figure S14. Crystal Explorer 17 estimate of lattice energies (kJ/mol) for (S, S)-5



| N | Symp                  | R     | Electron Density | E_ele | E_pol  | E_dis | E_rep | E_tot | Verifica |      |          |       |           |
|---|-----------------------|-------|------------------|-------|--------|-------|-------|-------|----------|------|----------|-------|-----------|
|   |                       |       |                  | 1,057 | 0,74   | 0,871 | 0,618 |       |          |      |          |       |           |
| 2 | x+1/2, -y+1/2, z+1/2  | 8,85  | B3LYP/6-31G(d,p) | -8,5  | -8,985 | -1,7  | -1,26 | -42,4 | -36,93   | 21,6 | 13,3488  | -33,8 | -33,8241  |
| 2 | -x+1/2, y+1/2, -z+1/2 | 8     | B3LYP/6-31G(d,p) | -5,9  | -6,236 | -2,1  | -1,55 | -38,1 | -33,185  | 17,4 | 10,7532  | -30,3 | -30,2222  |
| 1 | -x, -y, -z            | 8,68  | B3LYP/6-31G(d,p) | -1,8  | -0,951 | -1,9  | -0,7  | -38,3 | -16,68   | 19,1 | 5,9019   | -24,8 | -12,43205 |
| 2 | x, y, z               | 9,12  | B3LYP/6-31G(d,p) | -5    | -5,285 | -0,9  | -0,67 | -30,9 | -26,914  | 18,5 | 11,433   | -21,5 | -21,4319  |
| 1 | -x, -y, -z            | 8,89  | B3LYP/6-31G(d,p) | -3,5  | -1,85  | -1,6  | -0,59 | -23,7 | -10,321  | 12   | 3,708    | -18,1 | -9,0551   |
| 1 | -x, -y, -z            | 8,62  | B3LYP/6-31G(d,p) | -4,5  | -2,378 | -0,9  | -0,33 | -23,9 | -10,408  | 13,8 | 4,2642   | -17,6 | -8,8555   |
| 1 | -x, -y, -z            | 8,83  | B3LYP/6-31G(d,p) | -3,8  | -2,008 | -2,5  | -0,93 | -16,1 | -7,0116  | 7,9  | 2,4411   | -15   | -7,50375  |
| 2 | x+1/2, -y+1/2, z+1/2  | 9,94  | B3LYP/6-31G(d,p) | -1,7  | -1,797 | -0,5  | -0,37 | -18,1 | -15,765  | 6,9  | 4,2642   | -13,6 | -13,6678  |
| 2 | -x+1/2, y+1/2, -z+1/2 | 11,3  | B3LYP/6-31G(d,p) | -0,8  | -0,846 | -2    | -1,48 | -4,2  | -3,6582  | 0,7  | 0,4326   | -5,6  | -5,5512   |
| 2 | -x+1/2, y+1/2, -z+1/2 | 13,53 | B3LYP/6-31G(d,p) | -0,1  | -0,106 | 0     | 0     | -1,2  | -1,0452  | 0    | 0        | -1,2  | -1,1509   |
| 1 | -x, -y, -z            | 14,5  | B3LYP/6-31G(d,p) | -0,1  | -0,053 | 0     | 0     | -1,1  | -0,4791  | 0    | 0        | -1,1  | -0,5319   |
| 2 | -x+1/2, y+1/2, -z+1/2 | 12,91 | B3LYP/6-31G(d,p) | -0,1  | -0,106 | 0     | 0     | -0,9  | -0,7839  | 0    | 0        | -0,9  | -0,8896   |
| 2 | x, y, z               | 13,05 | B3LYP/6-31G(d,p) | 0     | 0      | 0     | 0     | -0,6  | -0,5226  | 0    | 0        | -0,5  | -0,5226   |
| 1 | -x, -y, -z            | 15,6  | B3LYP/6-31G(d,p) | -0,1  | -0,053 | 0     | 0     | -0,4  | -0,1742  | 0    | 0        | -0,5  | -0,22705  |
| 1 | -x, -y, -z            | 14,37 | B3LYP/6-31G(d,p) | 0,5   | 0,2643 | -0,1  | -0,04 | -1    | -0,4355  | 0    | 0        | -0,4  | -0,20825  |
| 2 | x+1/2, -y+1/2, z+1/2  | 14,97 | B3LYP/6-31G(d,p) | 0     | 0      | 0     | 0     | -0,5  | -0,4355  | 0    | 0        | -0,4  | -0,4355   |
| 1 | -x, -y, -z            | 15,47 | B3LYP/6-31G(d,p) | -0,1  | -0,053 | 0     | 0     | -0,3  | -0,1307  | 0    | 0        | -0,3  | -0,1835   |
| 2 | x, y, z               | 17,69 | B3LYP/6-31G(d,p) | -0,2  | -0,211 | 0     | 0     | -0,1  | -0,0871  | 0    | 0        | -0,3  | -0,2985   |
| 1 | -x, -y, -z            | 15,82 | B3LYP/6-31G(d,p) | -0,1  | -0,053 | 0     | 0     | -0,2  | -0,0871  | 0    | 0        | -0,3  | -0,13995  |
| 1 | -x, -y, -z            | 15,7  | B3LYP/6-31G(d,p) | -0,1  | -0,053 | 0     | 0     | -0,2  | -0,0871  | 0    | 0        | -0,2  | -0,13995  |
| 2 | x, y, z               | 15,92 | B3LYP/6-31G(d,p) | 0     | 0      | 0     | 0     | -0,2  | -0,1742  | 0    | 0        | -0,2  | -0,1742   |
| 2 | x+1/2, -y+1/2, z+1/2  | 15,89 | B3LYP/6-31G(d,p) | 0     | 0      | 0     | 0     | -0,2  | -0,1742  | 0    | 0        | -0,2  | -0,1742   |
| 2 | -x+1/2, y+1/2, -z+1/2 | 16,96 | B3LYP/6-31G(d,p) | 0     | 0      | 0     | 0     | -0,2  | -0,1742  | 0    | 0        | -0,2  | -0,1742   |
| 1 | -x, -y, -z            | 15,7  | B3LYP/6-31G(d,p) | -0,1  | -0,053 | 0     | 0     | -0,2  | -0,0871  | 0    | 0        | -0,2  | -0,13995  |
| 2 | x+1/2, -y+1/2, z+1/2  | 16,29 | B3LYP/6-31G(d,p) | 0     | 0      | 0     | 0     | -0,2  | -0,1742  | 0    | 0        | -0,1  | -0,1742   |
| 2 | x+1/2, -y+1/2, z+1/2  | 16,89 | B3LYP/6-31G(d,p) | 0     | 0      | 0     | 0     | -0,2  | -0,1742  | 0    | 0        | -0,1  | -0,1742   |
| 2 | x+1/2, -y+1/2, z+1/2  | 15,65 | B3LYP/6-31G(d,p) | 0,1   | 0,1057 | 0     | 0     | -0,3  | -0,2613  | 0    | 0        | -0,1  | -0,1556   |
| 2 | -x+1/2, y+1/2, -z+1/2 | 15,64 | B3LYP/6-31G(d,p) | 0,1   | 0,1057 | 0     | 0     | -0,2  | -0,1742  | 0    | 0        | -0,1  | -0,0685   |
| 2 | x+1/2, -y+1/2, z+1/2  | 16,52 | B3LYP/6-31G(d,p) | 0     | 0      | 0     | 0     | -0,1  | -0,0871  | 0    | 0        | -0,1  | -0,0871   |
| 2 | x, y, z               | 16,46 | B3LYP/6-31G(d,p) | 0,1   | 0,1057 | 0     | 0     | -0,2  | -0,1742  | 0    | 0        | -0,1  | -0,0685   |
| 2 | x, y, z               | 15,92 | B3LYP/6-31G(d,p) | 0,1   | 0,1057 | 0     | 0     | -0,2  | -0,1742  | 0    | 0        | 0     | -0,0685   |
| 1 | -x, -y, -z            | 18,25 | B3LYP/6-31G(d,p) | 0,3   | 0,1586 | 0     | 0     | -0,1  | -0,0436  | 0    | 0        | 0,2   | 0,115     |
|   |                       |       |                  |       | -30,23 |       | -7,92 |       | -167,01  |      | 56,547   |       | -148,6155 |
|   |                       |       |                  |       |        |       |       |       |          |      | -148,615 |       |           |

Figure S15. Crystal Explorer 17 estimate of lattice energies (kJ/mol) for (S, S) + (R, R)-5

| N | Symop             | Electron Density | R     | E_ele | E_pol    | E_dis | E_rep  | E_tot  |          |           |         |         |          |
|---|-------------------|------------------|-------|-------|----------|-------|--------|--------|----------|-----------|---------|---------|----------|
|   |                   |                  |       | 1,057 | 0,74     | 0,871 | 0,618  |        |          |           |         |         |          |
| 2 | -x, y+1/2, -z+1/2 | B3LYP/6-31G(d)   | 6,81  | -18   | -19,026  | -2,7  | -1,998 | -53,8  | -46,8598 | 31,8      | 19,6524 | -48,2   |          |
| 2 | x, y, z           | B3LYP/6-31G(d)   | 9,05  | -7,7  | -8,1389  | -1,9  | -1,406 | -31,7  | -27,6107 | 15,1      | 9,3318  | -27,9   |          |
| 2 | -x+1/2, -y, z+1/2 | B3LYP/6-31G(d)   | 9,48  | -5,7  | -6,0249  | -1,4  | -1,036 | -24,2  | -21,0782 | 14,1      | 8,7138  | -19,4   |          |
| 2 | -x+1/2, -y, z+1/2 | B3LYP/6-31G(d)   | 10,02 | -2    | -2,114   | -0,7  | -0,518 | -17,1  | -14,8941 | 6,9       | 4,2642  | -13,3   |          |
| 2 | x+1/2, -y+1/2, -z | B3LYP/6-31G(d)   | 10,37 | -3,3  | -3,4881  | -0,7  | -0,518 | -15,7  | -13,6747 | 6,6       | 4,0788  | -13,7   |          |
| 2 | x+1/2, -y+1/2, -z | B3LYP/6-31G(d)   | 10,69 | 0,6   | 0,6342   | -0,4  | -0,296 | -10,8  | -9,4068  | 3,9       | 2,4102  | -6,6    |          |
| 2 | -x, y+1/2, -z+1/2 | B3LYP/6-31G(d)   | 10,85 | -0,8  | -0,8456  | -0,3  | -0,222 | -7,6   | -6,6196  | 2,7       | 1,6686  | -6      |          |
| 2 | -x, y+1/2, -z+1/2 | B3LYP/6-31G(d)   | 11,79 | 0,1   | 0,1057   | -0,3  | -0,222 | -7     | -6,097   | 3,8       | 2,3484  | -3,9    |          |
| 2 | x+1/2, -y+1/2, -z | B3LYP/6-31G(d)   | 12,93 | 0     | 0        | 0     | 0      | -1     | -0,871   | 0         | 0       | -0,9    |          |
| 2 | x+1/2, -y+1/2, -z | B3LYP/6-31G(d)   | 13,19 | -0,1  | -0,1057  | 0     | 0      | -0,9   | -0,7839  | 0         | 0       | -0,9    |          |
| 2 | x, y, z           | B3LYP/6-31G(d)   | 13,56 | 0,3   | 0,3171   | 0     | 0      | -0,5   | -0,4355  | 0         | 0       | -0,1    |          |
| 2 | -x+1/2, -y, z+1/2 | B3LYP/6-31G(d)   | 14,63 | -0,4  | -0,4228  | 0     | 0      | -0,5   | -0,4355  | 0         | 0       | -0,8    |          |
| 2 | -x+1/2, -y, z+1/2 | B3LYP/6-31G(d)   | 14,99 | -0,2  | -0,2114  | 0     | 0      | -0,2   | -0,1742  | 0         | 0       | -0,4    |          |
| 2 | -x+1/2, -y, z+1/2 | B3LYP/6-31G(d)   | 15,59 | 0,1   | 0,1057   | 0     | 0      | -0,3   | -0,2613  | 0         | 0       | -0,2    |          |
| 2 | x, y, z           | B3LYP/6-31G(d)   | 16,3  | 0     | 0        | 0     | 0      | -0,2   | -0,1742  | 0         | 0       | -0,3    |          |
| 2 | x, y, z           | B3LYP/6-31G(d)   | 16,3  | 0     | 0        | 0     | 0      | -0,1   | -0,0871  | 0         | 0       | -0,1    |          |
| 2 | x+1/2, -y+1/2, -z | B3LYP/6-31G(d)   | 16,48 | -0,2  | -0,2114  | 0     | 0      | -0,2   | -0,1742  | 0         | 0       | -0,4    |          |
| 2 | -x+1/2, -y, z+1/2 | B3LYP/6-31G(d)   | 16,58 | 0,2   | 0,2114   | 0     | 0      | -0,3   | -0,2613  | 0         | 0       | 0       |          |
| 2 | x, y, z           | B3LYP/6-31G(d)   | 16,67 | 0     | 0        | 0     | 0      | -0,2   | -0,1742  | 0         | 0       | -0,2    |          |
| 2 | x+1/2, -y+1/2, -z | B3LYP/6-31G(d)   | 16,68 | 0     | 0        | 0     | 0      | -0,1   | -0,0871  | 0         | 0       | 0       |          |
| 1 | -x, y+1/2, -z+1/2 | B3LYP/6-31G(d)   | 18,19 | -0,1  | -0,05285 | 0     | 0      | -0,1   | -0,04355 | 0         | 0       | -0,1    |          |
| 1 | x+1/2, -y+1/2, -z | B3LYP/6-31G(d)   | 18,2  | -0,1  | -0,05285 | 0     | 0      | -0,1   | -0,04355 | 0         | 0       | -0,2    |          |
| 1 | x+1/2, -y+1/2, -z | B3LYP/6-31G(d)   | 18,38 | 0     | 0        | 0     | 0      | -0,1   | -0,04355 | 0         | 0       | -0,1    | -143,5   |
|   |                   |                  |       |       | -39,3204 |       |        | -6,216 |          | -150,2911 |         | 52,4682 | -143,359 |

Figure S16. *Crystal Explorer 17* estimate of lattice energies (kJ/mol) for (S, S)-6



| N | Symop         | R     | Electron Density | E_ele   |         | E_pol  |        | E_dis     |           | E_rep   |         | E_tot   |        |
|---|---------------|-------|------------------|---------|---------|--------|--------|-----------|-----------|---------|---------|---------|--------|
|   |               |       |                  | 1,057   |         | 0,74   |        | 0,871     |           | 0,618   |         |         |        |
| 1 | -             | 7,07  | B3LYP/6-31G(d,p) | -10,7   | -5,655  | -2,3   | -0,851 | -66,2     | -28,8301  | 39,8    | 12,2982 | -46,1   | -23,05 |
| 2 | x, y, z       | 14,65 | B3LYP/6-31G(d,p) | 0       | 0       | 0      | 0      | -0,5      | -0,4355   | 0       | 0       | -0,4    | -0,4   |
| 2 | x, y, z       | 9,51  | B3LYP/6-31G(d,p) | -5,4    | -5,7078 | -1,3   | -0,962 | -24,4     | -21,2524  | 8,6     | 5,3148  | -22,6   | -22,6  |
| 1 | -             | 11,4  | B3LYP/6-31G(d,p) | -2,7    | -1,427  | -0,4   | -0,148 | -7,7      | -3,35335  | 8,8     | 2,7192  | -4,4    | -2,2   |
| 1 | -             | 12,5  | B3LYP/6-31G(d,p) | 0,8     | 0,4228  | -0,1   | -0,037 | -1        | -0,4355   | 0       | 0       | -0,1    | -0,05  |
| 2 | -x, y+1/2, -z | 14,04 | B3LYP/6-31G(d,p) | -0,6    | -0,6342 | -0,1   | -0,074 | -1,5      | -1,3065   | 0       | 0       | -1,9    | -1,9   |
| 2 | -x, y+1/2, -z | 11,51 | B3LYP/6-31G(d,p) | -2,6    | -2,7482 | -0,4   | -0,296 | -10       | -8,71     | 6,5     | 4,017   | -7,7    | -7,7   |
| 1 | -             | 14,06 | B3LYP/6-31G(d,p) | -0,9    | -0,4757 | -0,1   | -0,037 | -4        | -1,742    | 2,2     | 0,6798  | -3,2    | -1,6   |
| 2 | x, y, z       | 12,32 | B3LYP/6-31G(d,p) | 0,4     | 0,4228  | 0      | 0      | -0,9      | -0,7839   | 0       | 0       | -0,4    | -0,4   |
| 1 | -             | 8,6   | B3LYP/6-31G(d,p) | -3,5    | -1,8498 | -1     | -0,37  | -28,4     | -12,3682  | 15,6    | 4,8204  | -19,5   | -9,75  |
| 1 | -             | 12,74 | B3LYP/6-31G(d,p) | -0,2    | -0,1057 | 0      | 0      | -1,8      | -0,7839   | 0       | 0       | -1,8    | -0,9   |
| 1 | -             | 6,98  | B3LYP/6-31G(d,p) | -16,2   | -8,5617 | -3,5   | -1,295 | -58       | -25,259   | 33,7    | 10,4133 | -49,4   | -24,7  |
| 2 | -x, y+1/2, -z | 13,93 | B3LYP/6-31G(d,p) | -0,4    | -0,4228 | 0      | 0      | -0,5      | -0,4355   | 0       | 0       | -0,9    | -0,9   |
| 2 | -x, y+1/2, -z | 10,08 | B3LYP/6-31G(d,p) | -1,2    | -1,2684 | -0,2   | -0,148 | -8,9      | -7,7519   | 0,8     | 0,4944  | -8,7    | -8,7   |
| 1 | -             | 7,77  | B3LYP/6-31G(d,p) | -11     | -5,8135 | -2,4   | -0,888 | -50,5     | -21,99275 | 28,3    | 8,7447  | -39,9   | -19,95 |
| 1 | -             | 12,28 | B3LYP/6-31G(d,p) | -0,9    | -0,4757 | -0,5   | -0,185 | -4,1      | -1,78555  | 0,6     | 0,1854  | -4,5    | -2,25  |
| 1 | -             | 11    | B3LYP/6-31G(d,p) | -0,7    | -0,37   | -0,3   | -0,111 | -14,3     | -6,22765  | 5,7     | 1,7613  | -9,9    | -4,95  |
| 1 | -             | 11,05 | B3LYP/6-31G(d,p) | -3,4    | -1,7969 | -0,8   | -0,296 | -9,4      | -4,0937   | 4,1     | 1,2669  | -10     | -5     |
| 0 | x, y, z       | 14,65 | B3LYP/6-31G(d,p) | 0,3     | 0       | 0      | 0      | -0,4      | -0        | 0       | 0       | 0       | 0      |
| 0 | x, y, z       | 9,51  | B3LYP/6-31G(d,p) | -6,9    | -0      | -2,5   | -0     | -13,1     | -0        | 9,5     | 0       | -14,6   | -0     |
| 1 | -             | 16,19 | B3LYP/6-31G(d,p) | -0,2    | -0,1057 | 0      | 0      | -0,4      | -0,1742   | 0       | 0       | -0,6    | -0,3   |
| 0 | -x, y+1/2, -z | 11,36 | B3LYP/6-31G(d,p) | -4,3    | -0      | -0,6   | -0     | -18,4     | -0        | 11,7    | 0       | -13,7   | -0     |
| 0 | x, y, z       | 12,32 | B3LYP/6-31G(d,p) | -0,3    | -0      | -0,2   | -0     | -8        | -0        | 4,7     | 0       | -4,5    | -0     |
| 0 | -x, y+1/2, -z | 13,95 | B3LYP/6-31G(d,p) | -0,1    | -0      | 0      | 0      | -0,8      | -0        | 0       | 0       | -0,8    | -0     |
| 0 | -x, y+1/2, -z | 10,24 | B3LYP/6-31G(d,p) | -2      | -0      | -0,6   | -0     | -18       | -0        | 6,7     | 0       | -14     | -0     |
| 1 | -             | 13,57 | B3LYP/6-31G(d,p) | 0,4     | 0,2114  | 0      | 0      | -0,7      | -0,30485  | 0       | 0       | -0,2    | -0,1   |
| 1 | -             | 19,81 | B3LYP/6-31G(d,p) | -0,3    | -0,1586 | 0      | 0      | -0,1      | -0,04355  | 0       | 0       | -0,4    | -0,2   |
| 1 | -             | 16,39 | B3LYP/6-31G(d,p) | 0       | 0       | 0      | 0      | -0,1      | -0,04355  | 0       | 0       | -0,1    | -0,05  |
| 2 | x, y, z       | 16,42 | B3LYP/6-31G(d,p) | -0,1    | -0,1057 | 0      | 0      | -0,1      | -0,0871   | 0       | 0       | -0,2    | -0,2   |
| 1 | -             | 18,5  | B3LYP/6-31G(d,p) | -0,1    | -0,0529 | 0      | 0      | -0,1      | -0,04355  | 0       | 0       | -0,2    | -0,1   |
| 1 | -             | 17,01 | B3LYP/6-31G(d,p) | 0,2     | 0,1057  | 0      | 0      | -0,2      | -0,0871   | 0       | 0       | 0,1     | 0,05   |
| 1 | -             | 16,16 | B3LYP/6-31G(d,p) | -0,2    | -0,1057 | 0      | 0      | -0,2      | -0,0871   | 0       | 0       | -0,4    | -0,2   |
| 1 | -x, y+1/2, -z | 17,69 | B3LYP/6-31G(d,p) | -0,1    | -0,0529 | 0      | 0      | -0,1      | -0,04355  | 0       | 0       | -0,2    | -0,1   |
| 1 | -             | 15,64 | B3LYP/6-31G(d,p) | 0,3     | 0,15855 | 0      | 0      | -0,3      | -0,13065  | 0       | 0       | 0       | 0      |
| 2 | -x, y+1/2, -z | 15,87 | B3LYP/6-31G(d,p) | 0,1     | 0,1057  | 0      | 0      | -0,3      | -0,2613   | 0       | 0       | -0,2    | -0,2   |
| 1 | -             | 15,08 | B3LYP/6-31G(d,p) | -0,5    | -0,2643 | 0      | 0      | -0,4      | -0,1742   | 0       | 0       | -0,9    | -0,45  |
| 1 | -             | 16,14 | B3LYP/6-31G(d,p) | 0,1     | 0,05285 | 0      | 0      | -0,3      | -0,13065  | 0       | 0       | -0,2    | -0,1   |
| 1 | -             | 19,4  | B3LYP/6-31G(d,p) | 0,1     | 0,05285 | 0      | 0      | -0,1      | -0,04355  | 0       | 0       | 0,1     | 0,05   |
|   |               |       |                  | -36,625 |         | -5,698 |        | -149,2023 |           | 52,7154 |         | -138,81 | -138,9 |

Figure S17. Crystal Explorer 17 estimate of lattice energies (kJ/mol) for (S, S)-7 (left molecule)



| N | Symop         | R     | Electron Density | E_ele | E_pol  | E_dis | E_rep  | E_tot |          |      |         |           |         |
|---|---------------|-------|------------------|-------|--------|-------|--------|-------|----------|------|---------|-----------|---------|
|   |               |       |                  | 1,057 | 0,74   | 0,871 | 0,618  |       |          |      |         |           |         |
| 1 | -             | 6,98  | B3LYP/6-31G(d)   | -16,2 | -8,562 | -3,5  | -1,295 | -58   | -25,259  | 33,7 | 10,4133 | -49,4     | -24,7   |
| 1 | -             | 7,07  | B3LYP/6-31G(d)   | -10,7 | -5,655 | -2,3  | -0,851 | -66,2 | -28,8301 | 39,8 | 12,2982 | -46,1     | -23,05  |
| 1 | -             | 7,77  | B3LYP/6-31G(d)   | -11   | -5,814 | -2,4  | -0,888 | -50,5 | -21,9928 | 28,3 | 8,7447  | -39,9     | -19,95  |
| 0 | x, y, z       | 9,51  | B3LYP/6-31G(d)   | -5,4  | -0     | -1,3  | -0     | -24,4 | -0       | 8,6  | 0       | -22,6     | -0      |
| 1 | -             | 8,6   | B3LYP/6-31G(d)   | -3,5  | -1,85  | -1    | -0,37  | -28,4 | -12,3682 | 15,6 | 4,8204  | -19,5     | -9,75   |
| 2 | x, y, z       | 9,51  | B3LYP/6-31G(d)   | -6,9  | -7,293 | -2,5  | -1,85  | -13,1 | -11,4101 | 9,5  | 5,871   | -14,6     | -14,6   |
| 2 | -x, y+1/2, -z | 10,24 | B3LYP/6-31G(d)   | -2    | -2,114 | -0,6  | -0,444 | -18   | -15,678  | 6,7  | 4,1406  | -14       | -14     |
| 2 | -x, y+1/2, -z | 11,36 | B3LYP/6-31G(d)   | -4,3  | -4,545 | -0,6  | -0,444 | -18,4 | -16,0264 | 11,7 | 7,2306  | -13,7     | -13,7   |
| 1 | -             | 11,05 | B3LYP/6-31G(d)   | -3,4  | -1,797 | -0,8  | -0,296 | -9,4  | -4,0937  | 4,1  | 1,2669  | -10       | -5      |
| 1 | -             | 11    | B3LYP/6-31G(d)   | -0,7  | -0,37  | -0,3  | -0,111 | -14,3 | -6,22765 | 5,7  | 1,7613  | -9,9      | -4,95   |
| 0 | -x, y+1/2, -z | 10,08 | B3LYP/6-31G(d)   | -1,2  | -0     | -0,2  | -0     | -8,9  | -0       | 0,8  | 0       | -8,7      | -0      |
| 0 | -x, y+1/2, -z | 11,51 | B3LYP/6-31G(d)   | -2,6  | -0     | -0,4  | -0     | -10   | -0       | 6,5  | 0       | -7,7      | -0      |
| 1 | -             | 12,28 | B3LYP/6-31G(d)   | -0,9  | -0,476 | -0,5  | -0,185 | -4,1  | -1,78555 | 0,6  | 0,1854  | -4,5      | -2,25   |
| 2 | x, y, z       | 12,32 | B3LYP/6-31G(d)   | -0,3  | -0,317 | -0,2  | -0,148 | -8    | -6,968   | 4,7  | 2,9046  | -4,5      | -4,5    |
| 1 | -             | 11,4  | B3LYP/6-31G(d)   | -2,7  | -1,427 | -0,4  | -0,148 | -7,7  | -3,35335 | 8,8  | 2,7192  | -4,4      | -2,2    |
| 1 | -             | 14,06 | B3LYP/6-31G(d)   | -0,9  | -0,476 | -0,1  | -0,037 | -4    | -1,742   | 2,2  | 0,6798  | -3,2      | -1,6    |
| 0 | -x, y+1/2, -z | 14,04 | B3LYP/6-31G(d)   | -0,6  | -0     | -0,1  | -0     | -1,5  | -0       | 0    | 0       | -1,9      | -0      |
| 1 | -             | 12,74 | B3LYP/6-31G(d)   | -0,2  | -0,106 | 0     | 0      | -1,8  | -0,7839  | 0    | 0       | -1,8      | -0,9    |
| 2 | -x, y+1/2, -z | 13,83 | B3LYP/6-31G(d)   | -0,5  | -0,529 | 0     | 0      | -0,6  | -0,5226  | 0    | 0       | -1        | -1      |
| 0 | -x, y+1/2, -z | 13,93 | B3LYP/6-31G(d)   | -0,4  | -0     | 0     | 0      | -0,5  | -0       | 0    | 0       | -0,9      | -0      |
| 1 | -             | 15,08 | B3LYP/6-31G(d)   | -0,5  | -0,264 | 0     | 0      | -0,4  | -0,1742  | 0    | 0       | -0,9      | -0,45   |
| 2 | -x, y+1/2, -z | 13,95 | B3LYP/6-31G(d)   | -0,1  | -0,106 | 0     | 0      | -0,8  | -0,6968  | 0    | 0       | -0,8      | -0,8    |
| 2 | x, y, z       | 16,42 | B3LYP/6-31G(d)   | -0,5  | -0,529 | 0     | 0      | -0,3  | -0,2613  | 0    | 0       | -0,7      | -0,7    |
| 1 | -             | 16,19 | B3LYP/6-31G(d)   | -0,2  | -0,106 | 0     | 0      | -0,4  | -0,1742  | 0    | 0       | -0,6      | -0,3    |
| 0 | x, y, z       | 14,65 | B3LYP/6-31G(d)   | 0     | 0      | 0     | 0      | -0,5  | -0       | 0    | 0       | -0,4      | -0      |
| 0 | x, y, z       | 12,32 | B3LYP/6-31G(d)   | 0,4   | 0      | 0     | 0      | -0,9  | -0       | 0    | 0       | -0,4      | -0      |
| 0 | -             | 19,81 | B3LYP/6-31G(d)   | -0,3  | -0     | 0     | 0      | -0,1  | -0       | 0    | 0       | -0,4      | -0      |
| 0 | -             | 16,16 | B3LYP/6-31G(d)   | -0,2  | -0     | 0     | 0      | -0,2  | -0       | 0    | 0       | -0,4      | -0      |
| 1 | -             | 16,91 | B3LYP/6-31G(d)   | -0,2  | -0,106 | 0     | 0      | -0,2  | -0,0871  | 0    | 0       | -0,4      | -0,2    |
| 1 | -             | 17,41 | B3LYP/6-31G(d)   | -0,3  | -0,159 | 0     | 0      | -0,2  | -0,0871  | 0    | 0       | -0,4      | -0,2    |
| 1 | -             | 13,57 | B3LYP/6-31G(d)   | 0,4   | 0,2114 | 0     | 0      | -0,7  | -0,30485 | 0    | 0       | -0,2      | -0,1    |
| 0 | x, y, z       | 16,42 | B3LYP/6-31G(d)   | -0,1  | -0     | 0     | 0      | -0,1  | -0       | 0    | 0       | -0,2      | -0      |
| 0 | -             | 18,5  | B3LYP/6-31G(d)   | -0,1  | -0     | 0     | 0      | -0,1  | -0       | 0    | 0       | -0,2      | -0      |
| 0 | -x, y+1/2, -z | 17,69 | B3LYP/6-31G(d)   | -0,1  | -0     | 0     | 0      | -0,1  | -0       | 0    | 0       | -0,2      | -0      |
| 0 | -x, y+1/2, -z | 15,87 | B3LYP/6-31G(d)   | 0,1   | 0      | 0     | 0      | -0,3  | -0       | 0    | 0       | -0,2      | -0      |
| 1 | -             | 16,14 | B3LYP/6-31G(d)   | 0,1   | 0,0529 | 0     | 0      | -0,3  | -0,13065 | 0    | 0       | -0,2      | -0,1    |
| 1 | -x, y+1/2, -z | 17,85 | B3LYP/6-31G(d)   | -0,1  | -0,053 | 0     | 0      | -0,1  | -0,04355 | 0    | 0       | -0,2      | -0,1    |
| 1 | -x, y+1/2, -z | 16,17 | B3LYP/6-31G(d)   | -0,1  | -0,053 | 0     | 0      | -0,2  | -0,0871  | 0    | 0       | -0,2      | -0,1    |
| 1 | -             | 12,5  | B3LYP/6-31G(d)   | 0,8   | 0,4228 | -0,1  | -0,037 | -1    | -0,4355  | 0    | 0       | -0,1      | -0,05   |
| 0 | -             | 16,39 | B3LYP/6-31G(d)   | 0     | 0      | 0     | 0      | -0,1  | -0       | 0    | 0       | -0,1      | -0      |
| 2 | x, y, z       | 14,65 | B3LYP/6-31G(d)   | 0,3   | 0,3171 | 0     | 0      | -0,4  | -0,3484  | 0    | 0       | 0         | 0       |
| 1 | -             | 15,64 | B3LYP/6-31G(d)   | 0,3   | 0,1586 | 0     | 0      | -0,3  | -0,13065 | 0    | 0       | 0         | 0       |
| 1 | -             | 17,01 | B3LYP/6-31G(d)   | 0,2   | 0,1057 | 0     | 0      | -0,2  | -0,0871  | 0    | 0       | 0,1       | 0,05    |
| 0 | -             | 19,4  | B3LYP/6-31G(d)   | 0,1   | 0      | 0     | 0      | -0,1  | -0       | 0    | 0       | 0,1       | 0       |
| 1 | -x, y+1/2, -z | 18,27 | B3LYP/6-31G(d)   | 0,2   | 0,1057 | 0     | 0      | -0,1  | -0,04355 | 0    | 0       | 0,1       | 0,05    |
|   |               |       |                  |       | -41,33 |       | -7,104 |       | -160,133 |      | 63,036  | -145,5301 | -145,15 |

Figure S18. Crystal Explorer 17 estimate of lattice energies (kJ/mol) for (S, S)-7 (right molecule)

| N | Symop                 | R     | Electron Density | E_ele | E_pol    | E_dis | E_rep  | E_tot |            |      |         |           |        |
|---|-----------------------|-------|------------------|-------|----------|-------|--------|-------|------------|------|---------|-----------|--------|
|   |                       |       |                  | 1,057 | 0,74     | 0,871 | 0,618  |       |            |      |         |           |        |
| 1 | -x, -y, -z            | 7,51  | B3LYP/6-31G(d)   | -21,6 | -11,4156 | -4    | -1,48  | -90   | -39,195    | 52,6 | 16,2534 | -71,6     | -35,8  |
| 2 | -x+1/2, y+1/2, -z+1/2 | 7,62  | B3LYP/6-31G(d)   | -11,4 | -12,0498 | -3,1  | -2,294 | -42   | -36,582    | 22,7 | 14,0286 | -36,9     | -36,9  |
| 1 | -x, -y, -z            | 8,85  | B3LYP/6-31G(d)   | -2,3  | -1,21555 | -1,1  | -0,407 | -36,2 | -15,7651   | 20,6 | 6,3654  | -22,1     | -11,05 |
| 2 | -x+1/2, y+1/2, -z+1/2 | 8,86  | B3LYP/6-31G(d)   | -5,8  | -6,1306  | -0,8  | -0,592 | -25,7 | -22,3847   | 13,9 | 8,5902  | -20,6     | -20,6  |
| 2 | x+1/2, -y+1/2, z+1/2  | 10,61 | B3LYP/6-31G(d)   | -5    | -5,285   | -1,1  | -0,814 | -16   | -13,936    | 8,7  | 5,3766  | -14,6     | -14,6  |
| 2 | x, y, z               | 9,89  | B3LYP/6-31G(d)   | -4,4  | -4,6508  | -1,1  | -0,814 | -15,8 | -13,7618   | 9    | 5,562   | -13,7     | -13,7  |
| 1 | -x, -y, -z            | 11,41 | B3LYP/6-31G(d)   | -2,5  | -1,32125 | -0,8  | -0,296 | -12,8 | -5,5744    | 9,6  | 2,9664  | -8,5      | -4,25  |
| 1 | -x, -y, -z            | 12,34 | B3LYP/6-31G(d)   | -4    | -2,114   | -0,4  | -0,148 | -7,5  | -3,26625   | 5,2  | 1,6068  | -7,8      | -3,9   |
| 2 | x+1/2, -y+1/2, z+1/2  | 11,43 | B3LYP/6-31G(d)   | -0,1  | -0,1057  | -0,3  | -0,222 | -6,5  | -5,6615    | 0,9  | 0,5562  | -5,4      | -5,4   |
| 2 | x+1/2, -y+1/2, z+1/2  | 11,69 | B3LYP/6-31G(d)   | 0     | 0        | -0,1  | -0,074 | -3,3  | -2,8743    | 0,2  | 0,1236  | -2,8      | -2,8   |
| 1 | -x, -y, -z            | 13,35 | B3LYP/6-31G(d)   | -0,2  | -0,1057  | 0     | 0      | -1,2  | -0,5226    | 0    | 0       | -1,3      | -0,65  |
| 2 | x, y, z               | 16,12 | B3LYP/6-31G(d)   | -0,7  | -0,7399  | 0     | 0      | -0,4  | -0,3484    | 0    | 0       | -1,1      | -1,1   |
| 1 | -x, -y, -z            | 15,01 | B3LYP/6-31G(d)   | -0,6  | -0,3171  | 0     | 0      | -0,5  | -0,21775   | 0    | 0       | -1        | -0,5   |
| 2 | x+1/2, -y+1/2, z+1/2  | 12,44 | B3LYP/6-31G(d)   | 0,3   | 0,3171   | 0     | 0      | -1,3  | -1,1323    | 0    | 0       | -0,9      | -0,9   |
| 2 | -x+1/2, y+1/2, -z+1/2 | 16,56 | B3LYP/6-31G(d)   | -0,3  | -0,3171  | 0     | 0      | -0,2  | -0,1742    | 0    | 0       | -0,5      | -0,5   |
| 1 | -x, -y, -z            | 14,15 | B3LYP/6-31G(d)   | -0,1  | -0,05285 | 0     | 0      | -0,4  | -0,1742    | 0    | 0       | -0,5      | -0,25  |
| 2 | -x+1/2, y+1/2, -z+1/2 | 15,93 | B3LYP/6-31G(d)   | -0,2  | -0,2114  | 0     | 0      | -0,2  | -0,1742    | 0    | 0       | -0,5      | -0,5   |
| 1 | -x, -y, -z            | 17,3  | B3LYP/6-31G(d)   | -0,2  | -0,1057  | 0     | 0      | -0,2  | -0,0871    | 0    | 0       | -0,4      | -0,2   |
| 2 | x, y, z               | 13,09 | B3LYP/6-31G(d)   | 0,4   | 0,4228   | 0     | 0      | -0,7  | -0,6097    | 0    | 0       | -0,2      | -0,2   |
| 1 | -x, -y, -z            | 15,17 | B3LYP/6-31G(d)   | 0,3   | 0,15855  | 0     | 0      | -0,4  | -0,1742    | 0    | 0       | -0,1      | -0,05  |
| 1 | -x, -y, -z            | 18,76 | B3LYP/6-31G(d)   | 0     | 0        | 0     | 0      | -0,1  | -0,04355   | 0    | 0       | -0,1      | -0,05  |
| 1 | -x+1/2, y+1/2, -z+1/2 | 17,72 | B3LYP/6-31G(d)   | 0,1   | 0,05285  | 0     | 0      | -0,2  | -0,0871    | 0    | 0       | -0,1      | -0,05  |
| 2 | x, y, z               | 16,41 | B3LYP/6-31G(d)   | 0,1   | 0,1057   | 0     | 0      | -0,1  | -0,0871    | 0    | 0       | 0         | 0      |
| 2 | x+1/2, -y+1/2, z+1/2  | 16,86 | B3LYP/6-31G(d)   | 0,1   | 0,1057   | 0     | 0      | -0,2  | -0,1742    | 0    | 0       | 0         | 0      |
| 1 | -x, -y, -z            | 17,43 | B3LYP/6-31G(d)   | 0,2   | 0,1057   | 0     | 0      | -0,1  | -0,04355   | 0    | 0       | 0,1       | 0,05   |
| 2 | x, y, z               | 16,41 | B3LYP/6-31G(d)   | 0,3   | 0,3171   | 0     | 0      | -0,2  | -0,1742    | 0    | 0       | 0,1       | 0,1    |
| 1 | x+1/2, -y+1/2, z+1/2  | 17,39 | B3LYP/6-31G(d)   | 0,2   | 0,1057   | 0     | 0      | -0,1  | -0,04355   | 0    | 0       | 0,1       | 0,05   |
| 1 | -x, -y, -z            | 14,53 | B3LYP/6-31G(d)   | 0,4   | 0,2114   | 0     | 0      | -0,3  | -0,13065   | 0    | 0       | 0,2       | 0,1    |
| 2 | -x+1/2, y+1/2, -z+1/2 | 17,27 | B3LYP/6-31G(d)   | 0,4   | 0,4228   | 0     | 0      | -0,2  | -0,1742    | 0    | 0       | 0,3       | 0,3    |
| 1 | -x+1/2, y+1/2, -z+1/2 | 17,93 | B3LYP/6-31G(d)   | 0,4   | 0,2114   | 0     | 0      | -0,1  | -0,04355   | 0    | 0       | 0,3       | 0,15   |
|   |                       |       |                  |       | -43,6013 |       | -7,141 |       | -163,61735 |      | 61,4292 | -152,9304 | -153,2 |

Figure S19. Crystal Explorer 17 estimate of lattice energies (kJ/mol) for (S, S) + (R, R)-7



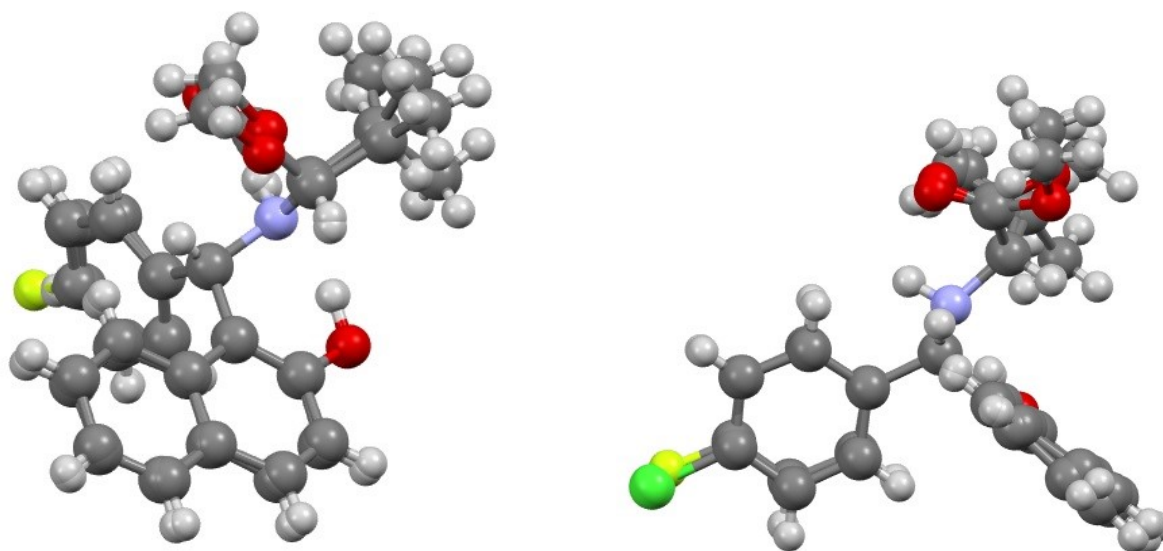

**Figure S20.** Molecular overlay of crystal structures of (*S,S*)-**5** with (*S,S*)-**6** (left). Molecular overlay of crystal structures of (*S,S*)-**6** with (*S,S*)-**7** (right).
